# Supplementary material for: A Role for Inositol Pyrophosphates in the Metabolic Adaptations to Low Phosphate in Arabidopsis
Source: MDPI journal article supplement (doi:10.3390/metabo11090601), 2021-09-04
Supplement: s1 [file s1]

Supplementary Table S4: Oligonucleotide primers used in this study.

| Primer   | Sequence                               |
|----------|----------------------------------------|
| VIP1 F   | 5' CAAGAAGTAGGTTCTTGTTTAAGCTTGGAGAC 3' |
| VIP1 R   | 5' GTTGTGGAAGAGGTTTACGAGTCGCTC 3'      |
| VIP2 F   | 5' CAAGAGGTTGGTTCATGTTTGACCCTC 3'      |
| VIP2 R   | 5' GTGGAAGGGCCAAAGTTTAACAAGACG 3'      |
| PP2A F   | 5' TAACGTGGCCAAAATGATGC 3'             |
| PP2A R   | 5' GTTCTCCACAACCGCTTGGT 3'             |
| PEX4 F   | 5' CTTAACTGCGACTCAGGGAATCTTCTAAG 3'    |
| PEX4 R   | 5' TCATCCTTTCTTAGGCATAGCGGC 3'         |
| PLDZ2 F  | 5' TCACGACAAGCAAGAACAGGTTAG 3'         |
| PLDZ2 R  | 5' AGTGCAGAGGAAGAGCACCATC 3'           |
| SPX1 F1  | 5' GATTCCATTGTTGGAGCAAGA 3'            |
| SPX1 R1  | 5' AATCTGTAGCTTCTTCTATTGTA 3'          |
| GDPD1 F  | 5' TGATGCAGCCCTTCTTGTCAGG 3'           |
| GDPD1 R  | 5' CTCCGTTGGTCAAGAAGAATACGG 3'         |
| MGD2 F   | 5' ATGGATGGGAGCTTGTGACTGC 3'           |
| MGD2 R   | 5' GGCACATTCCCTTTCTCCTGTC 3'           |
| MGD3 F   | 5' ACACTTGCCACCGTACATGGTTC 3'          |
| MGD3 R   | 5' TGCTCTCTTTGCAACCTCTTTGG 3'          |
| PHT1;5 F | 5' CGCTCTTGTAGCTCGGAATAC 3'            |
| PHT1;5 R | 5' TCCACTGAAGCACCTTAGACA 3'            |
| NPC4 F   | 5' GGATTGAGCCTGGCACAGTT 3'             |
| NPC4 R   | 5' GACGAATGCTCATATTGTGACCTT 3'         |
| PS2 F    | 5' TCTTGAGAACAAATCCCAATTCATC 3'        |
| PS2 R    | 5' CCTAAGCTCACACCCTAAATCATGT 3'        |
| SQD2 F   | 5' AAC CGG TTC TGT GTG CAA GCT G 3'    |
| SQD2 R   | 5' AGC CTC TCG TCT GAC CAC CTT TAC 3'  |

|        |                                     |
|--------|-------------------------------------|
| AT4 F  | 5' AGG AAC ACA CCT GAA TGG TGC 3'   |
| AT4 R  | 5' CCG TGT TTA CTT TGT TTC CGG T 3' |
| IPS1 F | 5' TTTGGAGAATAGTCAGACCAGTGC 3'      |
| IPS1 R | 5' TCACTATAAAGAGAATCGGAAGCA 3'      |
