# Supplementary material for: A Role for Inositol Pyrophosphates in the Metabolic Adaptations to Low Phosphate in Arabidopsis
Source: MDPI journal article supplement (doi:10.3390/metabo11090601), 2021-09-04
Supplement: s1 [file s1]

Supplementary Table S1: Comparison of *vip* double mutants presented in this work, and others.

| <b>Double mutant</b> | <b>At3G01310 (VIP1, VIH2)<br/>T-DNA Insertion</b> | <b>At5G15070 (VIP2, VIH1)<br/>T-DNA Insertion</b> | <b>Reference</b> |
|----------------------|---------------------------------------------------|---------------------------------------------------|------------------|
| <i>vip1-1/vip2-1</i> | GK_204E06                                         | SALK_094780                                       | This work        |
| <i>vip1-1/vip2-2</i> | GK_204E06                                         | SAIL_175_H09                                      | This work        |
| <i>vip1-2/vip2-2</i> | GK_008H11                                         | SAIL_175_H09                                      | This work        |
| <i>vih1-2/vih2-4</i> | GK_080A07                                         | SALK_094780                                       | Zhu et al. 2019  |
| <i>vih1-6/vih2-4</i> | GK_080A07                                         | SAIL_175_H09                                      | Zhu et al. 2019  |
| <i>vih1-2/vih2-3</i> | SAIL_165_H12                                      | SALK_094780                                       | Dong et al. 2019 |
| <i>vih1-3/vih2-3</i> | SAIL_165_H12                                      | SAIL_319_H07                                      | Dong et al. 2019 |
